# Supplementary material for: Altered brain fluid management in a rat model of arterial hypertension
Source: PubMed Central journal article supplement (PMC7318739; doi:10.1186/s12987-020-00203-6), 2020-06-26

**A**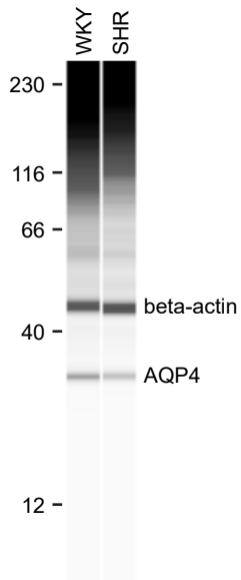**B**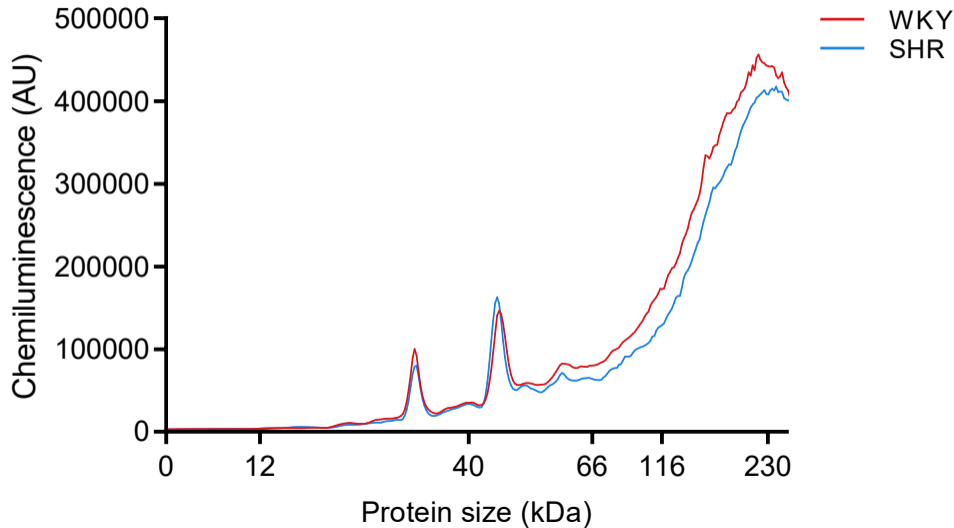

Supplement: 12987_2020_203_MOESM1_ESM.pdf [file 12987_2020_203_MOESM1_ESM.pdf]
